# Supplementary material for: Whole-brain 3D mapping of human neural transplant innervation
Source: PubMed Central journal article supplement (PMC5253698; doi:10.1038/ncomms14162), 2017-01-19
Supplement: ncomms14162-s1.pdf [file ncomms14162-s1.pdf]

Supplementary Information

Supplementary Figure 1

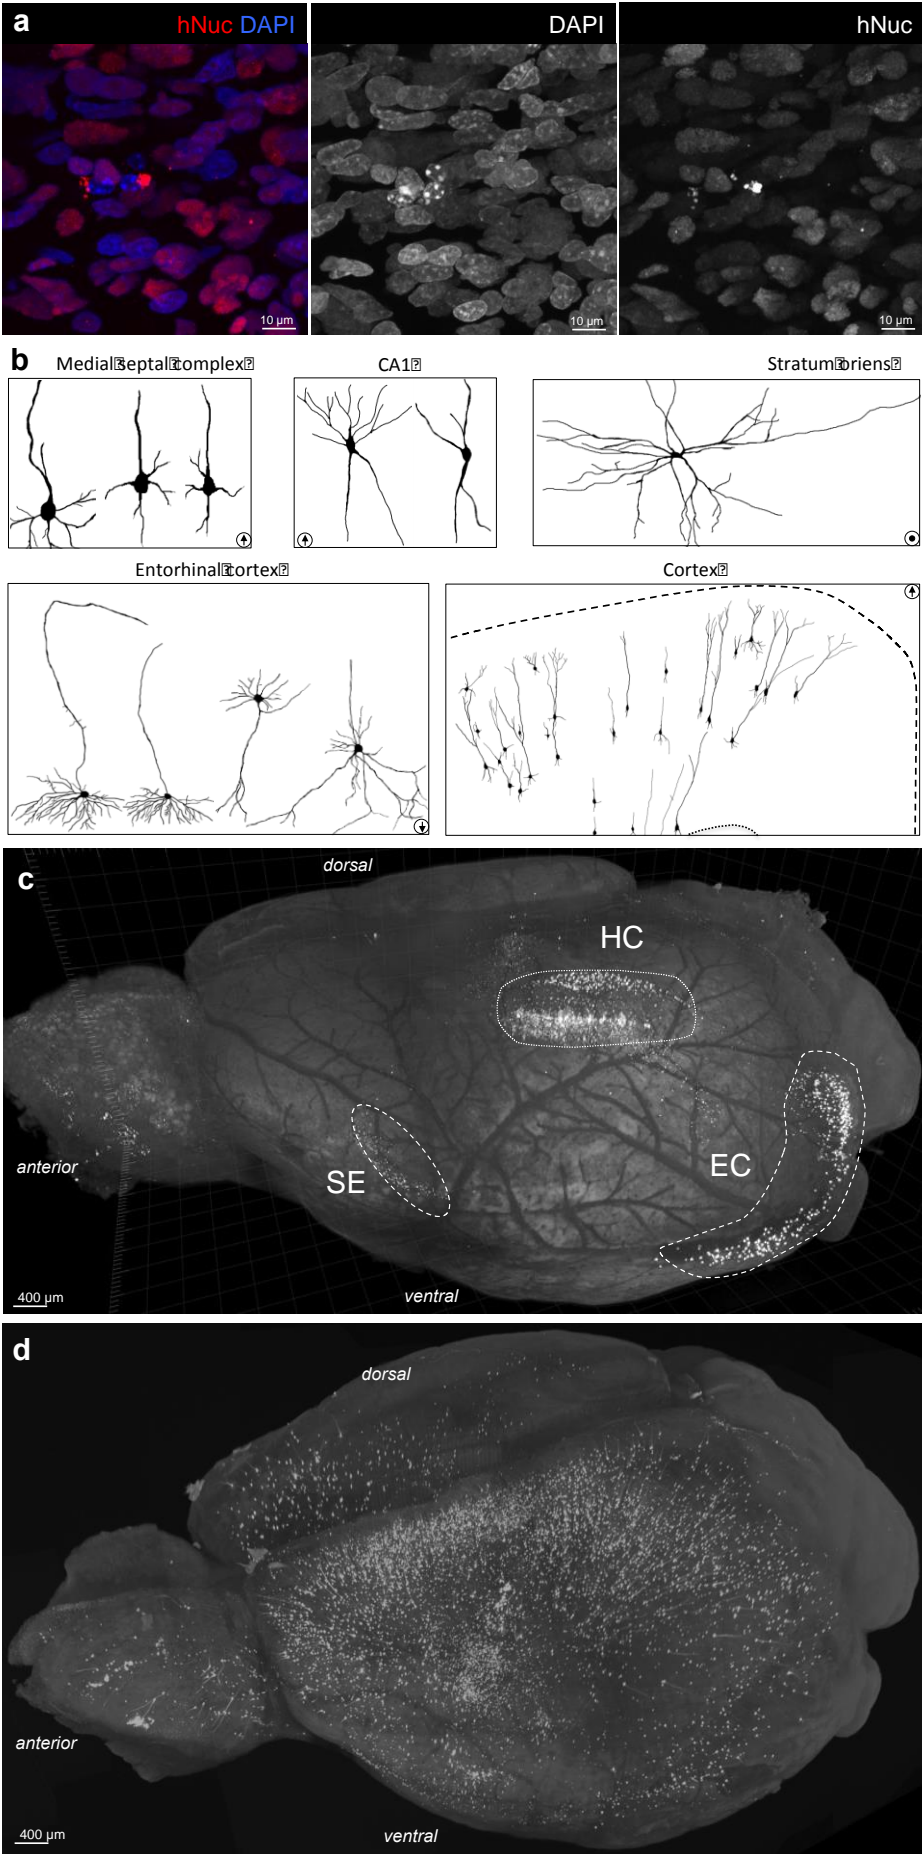

**Suppl. Fig. 1.** Human graft characterization and transsynaptic labeling of host neurons. **(a)** Graft core (shown for a hippocampal transplant) composed of tightly packed human cells (human nuclei (hNuc; MAB4383; Millipore), red; DAPI, blue). **(b)** Camera lucida drawings of transsynaptically EGFP-labeled neurons in superficial and deep brain regions including medial septal complex, entorhinal cortex, hippocampal CA1 region and stratum oriens (hippocampal graft) as well as neocortex (striatal graft); circled arrows point to the brain surface. **(c-d)** Viral tracing following stereotaxic delivery of a virus cocktail (rAAV (mRFP1/TVA receptor), rAAV (B19 glycoprotein) and RABV $\Delta$ G-EGFP(EnvA)) into the adult untransplanted hippocampus **(c)** or striatum **(d)** to visualize endogenous innervation of the target area. Analysis was performed 10 days after injection. Scale bars in a, c and d as indicated.

## Supplementary Figure 2

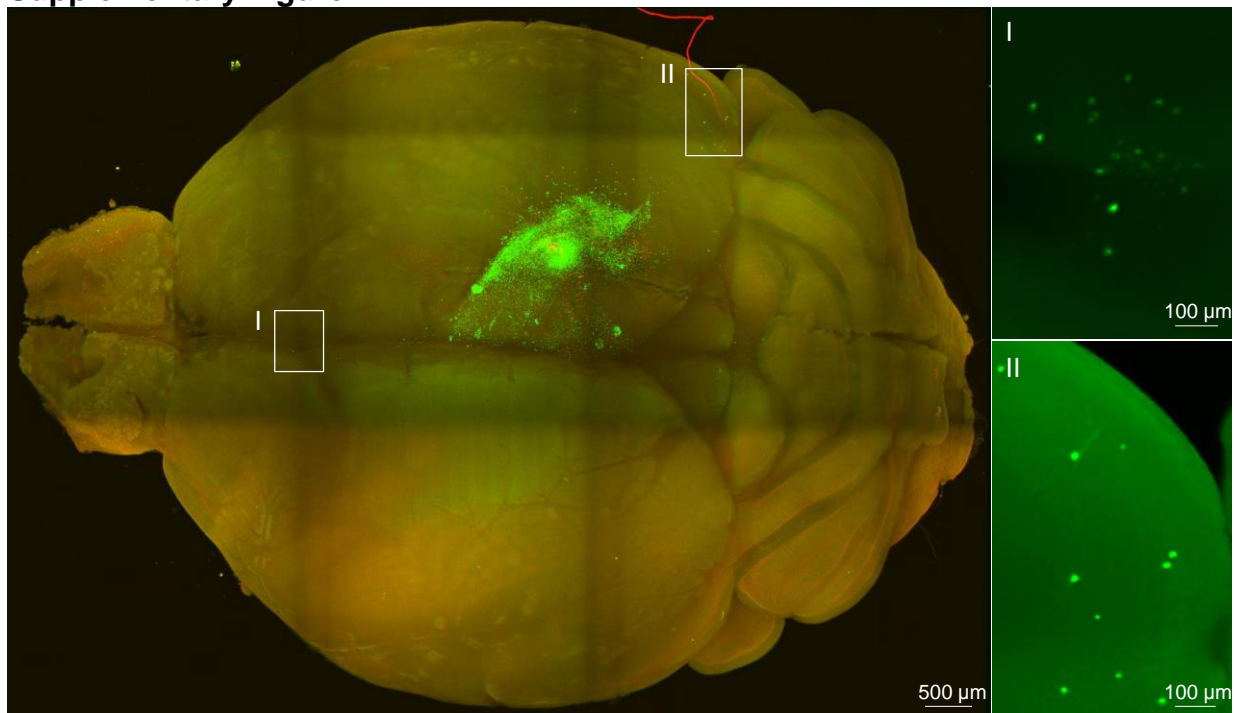

**Suppl. Fig. 2.** Transsynaptic tracing of a striatal graft of small molecule neural precursor cells (smNPCs) derived from human induced pluripotent stem cells (iPSCs; generated with informed consent of the donor and approved by the Ethics Committee of the University of Bonn Medical Faculty). SmNPCs were generated as previously described<sup>1</sup>. Briefly, induced pluripotent stem cell differentiation was induced by supplementing iPSC growth medium with SB-431542 (10  $\mu$ M), dorsomorphin (1  $\mu$ M), purmorphamine (PM, 0.5  $\mu$ M) and CHIR99021 (CHIR, 3  $\mu$ M). Evolving smNPCs were propagated in medium containing PM and CHIR. Cells were transduced with the constructs pLVX-SynHTB and pLentiWE-Ef1 $\alpha$ -mRFP1, and 100,000 cells suspended in 1  $\mu$ l of Cytocon Buffer II (Evotec Technologies) were transplanted into the hippocampus of 8-week-old mice. Ten weeks later, the transplant was stereotaxically infected with RABV $\Delta$ G-EGFP(EnvA). Graft recipients were sacrificed 10 days later, and fixed brain were subjected to tissue clearing and light sheet fluorescence microscopy. EGFP+ labeled donor cells were detected within the hippocampal formation, but also in the medial septal complex (I) and in the entorhinal cortex (II), i.e. characteristic input regions of the hippocampus. Scale bars as indicated.

## Supplementary Table 1

### Hippocampal grafts

|                       | Animal 1 | Animal 2 | Animal 3 |
|-----------------------|----------|----------|----------|
| Transplanted cells    | ~40,000  | ~40,000  | ~60,000  |
| mRFP1-positive cells* | 44592    | 35165    | 58617    |
| CE**                  | 0.0332   | 0.0343   | 0.0455   |

#### Absolute number of EGFP-only-positive host cells

|                         |            |            |            |
|-------------------------|------------|------------|------------|
| Cortex                  |            |            |            |
| Entorhinal cortex       | 53         | 40         | 47         |
| Occipital lobe          | 1          | 0          | 4          |
| Parieto-temporal lobe   | 2          | 5          | 5          |
| Hippocampal formation   | 431        | 450        | 381        |
| Basal forebrain         | 0          | 2          | 4          |
| Lateral septum          | 0          | 4          | 5          |
| Medial septal complex   | 47         | 19         | 34         |
| Mesencephalic tegmentum | 3          | 0          | 0          |
| Pons                    | 0          | 2          | 0          |
| <b>total</b>            | <b>537</b> | <b>522</b> | <b>480</b> |

### Striatal grafts

|                       | Animal 1 | Animal 2 | Animal 3 |
|-----------------------|----------|----------|----------|
| Transplanted cells    | ~60,000  | ~60,000  | ~60,000  |
| mRFP1-positive cells* | 56380    | 75219    | 67833    |
| CE**                  | 0.0484   | 0.0417   | 0.0448   |

#### Absolute number of EGFP-only-positive host cells

|                         |             |             |             |
|-------------------------|-------------|-------------|-------------|
| Cortex                  | 535         | 1150        | 337         |
| Hippocampal formation   | 0           | 0           | 1           |
| Basal forebrain         | 5           | 7           | 4           |
| Medial septum           | 0           | 1           | 0           |
| Striatum                | 607         | 312         | 1045        |
| Globus pallidus         | 107         | 53          | 168         |
| Amygdala                | 1           | 1           | 15          |
| Hypothalamus            | 2           | 3           | 1           |
| Thalamus                | 36          | 72          | 49          |
| Mesencephalic tegmentum | 34          | 47          | 32          |
| Pons                    | 1           | 1           | 0           |
| <b>Total</b>            | <b>1328</b> | <b>1647</b> | <b>1652</b> |

#### Regional stratification of EGFP-only-positive cells in cortex

|                                                |            |             |            |
|------------------------------------------------|------------|-------------|------------|
| Primary somatosensory cortex                   | 67         | 28          | 2          |
| Primary somatosensory cortex, barrel field     | 57         | 129         | 21         |
| Primary somatosensory cortex, dysgranular zone | 0          | 20          | 4          |
| Primary somatosensory cortex, forelimb         | 92         | 33          | 40         |
| Primary somatosensory cortex, hindlimb region  | 15         | 5           | 2          |
| Primary somatosensory cortex, upper lip region | 53         | 50          | 12         |
| Secondary somatosensory cortex                 | 21         | 32          | 6          |
| Primary motor cortex                           | 115        | 215         | 51         |
| Secondary motor cortex                         | 49         | 73          | 30         |
| Insular region (combined)                      | 8          | 50          | 17         |
| Lateral orbital cortex                         | 0          | 240         | 12         |
| Dorsolateral orbital cortex                    | 5          | 0           | 7          |
| Medial orbital cortex                          | 0          | 4           | 0          |
| Ventral orbital cortex                         | 0          | 52          | 9          |
| Cingulate cortex area 24a                      | 0          | 18          | 0          |
| Cingulate cortex area 24b                      | 0          | 45          | 9          |
| Cingulate cortex area 24b'                     | 2          | 0           | 0          |
| Cingulate cortex area 32                       | 5          | 12          | 0          |
| Frontal association cortex                     | 38         | 115         | 112        |
| Perirhinal cortex                              | 1          | 2           | 0          |
| Piriform cortex                                | 5          | 12          | 3          |
| Ventral intermediate entorhinal cortex         | 0          | 5           | 0          |
| Frontal cortex area 3                          | 0          | 7           | 0          |
| Secondary auditory cortex, dorsal area         | 1          | 0           | 0          |
| Secondary visual cortex, lateral area          | 1          | 3           | 0          |
| <b>Total</b>                                   | <b>535</b> | <b>1150</b> | <b>337</b> |

\* cell number determined by stereological analysis

\*\* 2nd estimated coefficient of error (Schmitz-Hof)

**Suppl. Table 1.** Quantification of grafted human cells and EGFP<sup>+</sup> host input neurons. Shown are stereologically determined numbers of engrafted mRFP1-positive cells upon hippocampal or striatal transplantation. CE, coefficient of error, n=3; Stereo Investigator (MBF). EGFP-positive host neurons were quantified using co-registered datasets that allow allocation of fluorescent signals to the MRI-based atlases. Stratification was restricted to the major anatomical subdivisions according to the Allen Mouse Brain Atlas <sup>2</sup>.

## Supplementary References

1. Reinhardt P, *et al.* Derivation and expansion using only small molecules of human neural progenitors for neurodegenerative disease modeling. *PLoS ONE* **8**, e59252 (2013).
2. Lein ES, *et al.* Genome-wide atlas of gene expression in the adult mouse brain. *Nature* **445**, 168-176 (2007).
